# Supplementary material
Source: Springer Nature journal article supplement (https://www.springermedizin.de/resource/supplementary/13058_2004_956_MOESM2_ESM.pdf/9705726)

**ER $\alpha$**  : 65 kDa

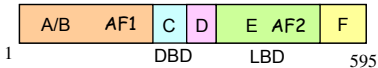

**ER $\beta$**  : 60 kDa

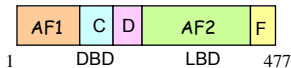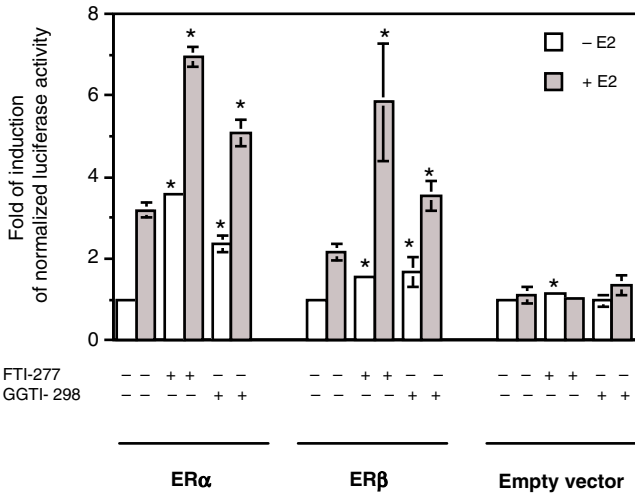

Supplement: MOESM2 [file 9705726]
